# Supplementary material
Source: PubMed Central journal article supplement (PMC8264856)
Supplement: CHO_Supplements_ready.pdf [file CHO_Supplements_ready.pdf]

**Supplementary Material**

**Table 5. Associations of Salivary Testosterone and Cortisol Levels with Physical Growth (Bodyweight, Length, & Head Circumference), Development (Cognitive, Motor, Language, & Socioemotional), and Health (Technology-Dependence & Common Health Problems) among VLBW Infants over the 2 Years after Birth Using Bayesian Model**

| <b>Effect</b>                             | <b>Estimate</b> | <b>95% CI</b>    | <b>BF</b> | <b>Effect</b> | <b>Estimate</b> | <b>95% CI</b>   | <b>BF</b> |
|-------------------------------------------|-----------------|------------------|-----------|---------------|-----------------|-----------------|-----------|
| <b><u>Body weight</u></b>                 |                 |                  |           |               |                 |                 |           |
| Testosterone                              | -0.021          | (-0.051, 0.008)  | 0.042     | Cortisol      | 0.004           | (-1.711, 1.699) | 0.869     |
| Time                                      | 0.179           | (0.104, 0.252)   | >10       | Time          | 0.234           | (0.187, 0.279)  | >10       |
| Testosterone*Time                         | 0.002           | (0.000, 0.005)   | 0.024     | Cortisol*Time | 0.001           | (-0.161, 0.164) | 0.510     |
| <b><u>Length</u></b>                      |                 |                  |           |               |                 |                 |           |
| Testosterone                              | -0.072          | (-0.122, -0.021) | 1.324     | Cortisol      | -0.085          | (-1.969, 1.769) | 0.956     |
| Time                                      | 0.950           | (0.828, 1.071)   | >10       | Time          | 1.087           | (1.014, 1.159)  | >10       |
| Testosterone*Time                         | 0.004           | (0.000, 0.007)   | 4.212     | Cortisol*Time | 0.088           | (-0.149, 0.327) | 2.600     |
| <b><u>Head circumference</u></b>          |                 |                  |           |               |                 |                 |           |
| Testosterone                              | -0.045          | (-0.067, -0.022) | >10       | Cortisol      | -0.568          | (-2.210, 1.043) | 1.041     |
| Time                                      | 0.140           | (0.085, 0.195)   | >10       | Time          | 0.235           | (0.195, 0.275)  | >10       |
| Testosterone*Time                         | 0.003           | (0.001, 0.005)   | >10       | Cortisol*Time | 0.018           | (-0.125, 0.165) | 0.617     |
| <b><u># of Technology-Dependent</u></b>   |                 |                  |           |               |                 |                 |           |
| Testosterone                              | -0.006          | (-0.038, 0.025)  | 0.017     | Cortisol      | -0.318          | (-2.078, 1.419) | 0.931     |
| Time                                      | -0.026          | (-0.109, 0.054)  | 0.050     | Time          | -0.013          | (-0.064, 0.037) | 0.027     |
| Testosterone*Time                         | 0.000           | (-0.002, 0.003)  | 0.001     | Cortisol*Time | -0.008          | (-0.191, 0.164) | 0.026     |
| <b><u># of Common health problems</u></b> |                 |                  |           |               |                 |                 |           |
| Testosterone                              | -0.001          | (-0.012, 0.011)  | 0.006     | Cortisol      | -0.238          | (-1.312, 0.830) | 0.595     |
| Time                                      | 0.006           | (-0.021, 0.034)  | 0.017     | Time          | 0.004           | (-0.017, 0.026) | 0.011     |
| Testosterone*Time                         | 0.000           | (-0.001, 0.001)  | 0.000     | Cortisol*Time | 0.014           | (-0.067, 0.094) | 0.007     |

table continued

Table 5 continued.

| <b><u>Cognitive development</u></b>      |        |                 |       |               |        |                 |       |
|------------------------------------------|--------|-----------------|-------|---------------|--------|-----------------|-------|
| Testosterone                             | -0.239 | (-0.550, 0.062) | 0.455 | Cortisol      | -0.066 | (-1.929, 1.896) | 0.997 |
| Time                                     | -0.334 | (-1.103, 0.395) | 0.609 | Time          | 0.196  | (-0.238, 0.612) | 0.320 |
| Testosterone*Time                        | 0.015  | (-0.009, 0.039) | 0.199 | Cortisol*Time | -0.206 | (-1.346, 0.969) | 0.308 |
| <b><u>Language development</u></b>       |        |                 |       |               |        |                 |       |
| Testosterone                             | -0.173 | (-0.464, 0.130) | 0.276 | Cortisol      | -0.044 | (-1.993, 1.854) | 1.030 |
| Time                                     | -0.646 | (-1.374, 0.115) | 1.784 | Time          | -0.220 | (-0.621, 0.198) | 0.370 |
| Testosterone*Time                        | 0.011  | (-0.012, 0.034) | 0.272 | Cortisol*Time | -0.326 | (-1.466, 0.817) | 0.348 |
| <b><u>Motor development</u></b>          |        |                 |       |               |        |                 |       |
| Testosterone                             | -0.067 | (-0.370, 0.235) | 0.172 | Cortisol      | -0.071 | (-2.023, 1.905) | 1.034 |
| Time                                     | 0.234  | (-0.505, 0.972) | 0.459 | Time          | 0.373  | (-0.042, 0.773) | 0.993 |
| Testosterone*Time                        | 0.001  | (-0.021, 0.025) | 0.081 | Cortisol*Time | -0.127 | (-1.276, 1.096) | 0.643 |
| <b><u>Socioemotional development</u></b> |        |                 |       |               |        |                 |       |
| Testosterone                             | -0.234 | (-0.681, 0.200) | 0.384 | Cortisol      | 0.026  | (-1.929, 2.027) | 1.037 |
| Time                                     | 0.867  | (-0.224, 1.907) | 2.043 | Time          | 1.367  | (0.786, 1.926)  | >10   |
| Testosterone*Time                        | 0.031  | (-0.004, 0.066) | 0.854 | Cortisol*Time | 0.689  | (-0.629, 2.039) | 3.389 |

Note: CI = Credible interval, BF = Bayesian factor
